# Supplementary material for: Effects of colonic fermentation on the stability of fresh and black onion bioactives
Source: Royal Society of Chemistry journal article supplement (doi:10.1039/d1fo04240h), 2022-01-01
Supplement: d1fo04240h1.pdf [file d1fo04240h1.pdf]

## SUPPLEMENTARY INFORMATION

### *Effect of colonic fermentation on the stability of fresh and black onion bioactives*

Alicia Moreno-Ortega<sup>1,2</sup>, Giuseppe Di Pede<sup>3</sup>, Pedro Mena<sup>3,4</sup>, Luca Calani<sup>3</sup>, Daniele Del Rio<sup>3,4</sup>,  
José Manuel Moreno-Rojas<sup>2,5\*</sup>, Gema Pereira-Caro<sup>2,5\*</sup>

<sup>1</sup>Departamento de Bromatología y Tecnología de los Alimentos, Campus Rabanales, Ed. Darwin-anexo  
Universidad de Córdoba, 14071 Córdoba, Spain.

<sup>2</sup>Foods for Health Group, Instituto Maimónides de Investigación Biomédica de Córdoba (IMIBIC),  
Córdoba, Spain.

<sup>3</sup>Department of Food and Drugs, University of Parma, 43124 Parma, Italy;

<sup>4</sup>Microbiome Research Hub, University of Parma, 43124 Parma, Italy.

<sup>5</sup>Department of Food Science and Health, Andalusian Institute of Agricultural and Fisheries Research and  
Training (IFAPA), Alameda del Obispo, Avda. Menéndez-Pidal, 14004 Córdoba, Spain;

\*Corresponding authors:

Dra. Gema Pereira-Caro ([mariag.pereira@juntadeandalucia.es](mailto:mariag.pereira@juntadeandalucia.es))

Dr. José Manuel Moreno-Rojas ([josem.moreno.rojas@juntadeandalucia.es](mailto:josem.moreno.rojas@juntadeandalucia.es))

IFAPA-Alameda del Obispo, Department of Food Science and Health, Avenida Menéndez  
Pidal, SN, 14071 Córdoba (Spain). Tel. 0034 671 532 734

**Table S1.-** UHPLC-LIT-MS<sup>n</sup>-based identification of phenolic and organosulfur compounds detected in fresh and black onion during in vitro colonic fermentation

| Compound                                      | RT (min) | Parent mass (m/z)  | MS fragmentation pattern from full scan data dependent analyses (m/z) | MS <sup>2</sup> fragmentation pattern from full MS/MS analyses (m/z) | MSI MI Level* | Sample |
|-----------------------------------------------|----------|--------------------|-----------------------------------------------------------------------|----------------------------------------------------------------------|---------------|--------|
| <b>Phenolic Compounds</b>                     |          | [M-H] <sup>-</sup> |                                                                       |                                                                      |               |        |
| <b>Flavonols</b>                              |          |                    |                                                                       |                                                                      |               |        |
| Quercetin                                     | 6.12     | 301                |                                                                       | 179, 151, 273, 257, 193, 239, 107, 283                               | 1             | FO; BO |
| Kaempferol                                    | 6.97     | 285                |                                                                       | 151, 229, 257, 213, 243, 185, 169, 107, 143                          | 1             | FO; BO |
| Quercetin-3- <i>O</i> -rutinoside (rutin)     | 4.29     | 609                |                                                                       | 301, 300, 343, 271, 179, 591                                         | 1             | FO; BO |
| Isorhamnetin                                  | 9.13     | 315                |                                                                       | 297, 279, 171, 241, 227, 151                                         | 2             | FO; BO |
| Quercetin-3- <i>O</i> -glucoside              | 5.20     | 463                |                                                                       | 301, 343, 419, 373                                                   | 2             | FO; BO |
| Quercetin-4- <i>O</i> -glucoside              | 4.20     | 463                |                                                                       | 373, 351, 419, 342, 445, 301, 217                                    | 2             | FO     |
| Isorhamnetin glucoside                        | 5.15     | 477                |                                                                       | 315, 396, 459, 357, 260, 408                                         | 2             | FO     |
| <b>Flavone</b>                                |          |                    |                                                                       |                                                                      |               |        |
| Luteolin                                      | 6.13     | 285                |                                                                       | 241, 175, 199, 217, 241, 257, 151, 107                               | 1             | FO; BO |
| <b>Hydroxycinnamic acids</b>                  |          |                    |                                                                       |                                                                      |               |        |
| 4'-Hydroxycinnamic acid                       | 3.31     | 163                |                                                                       | 119, 135                                                             | 1             | FO; BO |
| 3',4'-Dihydroxycinnamic acid                  | 2.51     | 179                |                                                                       | 135, 151, 117, 91                                                    | 1             | FO; BO |
| 4'-Hydroxy-3'-methoxycinnamic acid            | 3.70     | 193                |                                                                       | 149, 178, 134, 107                                                   | 1             | FO; BO |
| <b>Phenylpropanoic acids derivatives</b>      |          |                    |                                                                       |                                                                      |               |        |
| 3-(3',4'-Dihydroxyphenyl)propanoic acid       | 1.85     | 181                |                                                                       | 137, 119, 59, 163                                                    | 1             | FO; BO |
| 3-(4'-Hydroxy-3'-methoxyphenyl)propanoic acid | 3.08     | 195                |                                                                       | 136, 151, 177, 123, 59                                               | 1             | FO; BO |
| 3-(3'-Hydroxy-4'-methoxyphenyl)propanoic acid | 3.42     | 195                |                                                                       | 119, 151, 149, 136, 180, 93                                          | 1             | BO     |
| 3-(3'-Hydroxyphenyl)propanoic acid            | 3.10     | 165                |                                                                       | 121, 147, 165, 97                                                    | 1             | FO; BO |
| 3-Phenylpropanoic acid                        | 4.80     | 149                |                                                                       | 105, 131                                                             | 1             | FO; BO |
| <b>Phenylacetic acids derivatives</b>         |          |                    |                                                                       |                                                                      |               |        |
| 4'-Hydroxyphenylacetic acid                   | 1.85     | 151                |                                                                       | 107, 120, 93                                                         | 1             | FO; BO |
| 3-Phenylacetic acid                           | 3.36     | 135                |                                                                       | 91                                                                   | 1             | BO     |

**Benzoic acids derivatives**

|                                 |      |     |                   |   |        |
|---------------------------------|------|-----|-------------------|---|--------|
| Benzoic acid                    | 3.50 | 121 | 77                | 1 | FO; BO |
| 4-Hydroxy-3-methoxybenzoic acid | 2.31 | 167 | 123, 152, 108, 79 | 1 | FO; BO |
| 3,4-Dihydroxybenzoic acid       | 1.16 | 153 | 109, 135, 81      | 1 | FO; BO |
| 3-Hydroxybenzoic acid           | 2.08 | 137 | 93, 115           | 1 | FO; BO |
| 4-Hydroxybenzoic acid           | 1.78 | 137 | 93                | 1 | FO; BO |
| 3-Hydroxy-4-methoxybenzoic acid | 2.44 | 167 | 152, 123, 99      | 1 | FO; BO |
| 3,4,5-Trihydroxybenzoic acid    | 0.74 | 169 | 125, 97, 81       | 1 | BO     |

**Hydroxycarboxylic acids derivatives**

|                         |      |     |              |   |        |
|-------------------------|------|-----|--------------|---|--------|
| 3'-Hydroxymandelic acid | 0.87 | 167 | 123, 105, 85 | 1 | FO; BO |
|-------------------------|------|-----|--------------|---|--------|

**Benzenetriol**

|                     |      |     |        |   |        |
|---------------------|------|-----|--------|---|--------|
| Benzene-1,3,5-triol | 0.65 | 125 | 83, 57 | 1 | FO; BO |
|---------------------|------|-----|--------|---|--------|

**Organosulfur Compounds****[M-H]<sup>+</sup>*****γ*-Glutamyl-S-Alk(en)yl-L-Cysteine Sulfoxides**

|                                                              |      |     |                              |   |        |
|--------------------------------------------------------------|------|-----|------------------------------|---|--------|
| <i>γ</i> -Glutamyl-S-methyl-L-cysteine sulfoxide (GSMCS)     | 4.85 | 281 | 121, 132, 173, 207, 235, 245 | 2 | FO; BO |
| <i>γ</i> -Glutamyl-S-(2-propenyl) cysteine sulfoxide (G2PCS) | 3.89 | 307 | 229, 269, 171, 146, 130      | 2 | FO     |
| <i>γ</i> -Glutamyl-S-(1-propenyl) cysteine sulfoxide (G1PCS) | 7.92 | 307 | 176, 207, 134, 235, 269      | 2 | FO; BO |

***γ*-Glutamyl-S-Alk(en)yl-L-Cysteine Derivatives**

|                                                         |      |     |                                   |   |        |
|---------------------------------------------------------|------|-----|-----------------------------------|---|--------|
| <i>γ</i> -Glutamyl-L-cysteine                           | 4.06 | 251 | 223, 234, 166, 178, 110, 206, 138 | 2 | FO; BO |
| <i>γ</i> -Glutamyl-S-(S-methyl) cysteine-glycine        | 4.59 | 354 | 244, 118, 145, 260, 203           | 2 | FO; BO |
| <i>γ</i> -Glutamyl-S-(2-carboxypropyl) cysteine-glycine | 7.06 | 394 | 148, 365, 218, 291, 263           | 2 | FO     |
| <i>γ</i> -Glutamyl-S-allyl-L-cysteine (GSAC)            | 6.19 | 291 | 162, 145, 170, 274, 245, 122, 84  | 1 | FO; BO |
| <i>γ</i> -Glutamyl-S-(2-propenyl) cysteine (GS2PC)      | 7.09 | 291 | 148, 291, 365, 203                | 2 | FO; BO |
| <i>γ</i> -Glutamyl-S-(2-carboxypropyl) cysteine         | 6.95 | 335 | 120, 161, 203, 229, 290, 302      | 2 | BO     |

***S*-Alk(en)yl-L-Cysteine Sulfoxides Derivatives**

|                                                 |      |     |                           |   |        |
|-------------------------------------------------|------|-----|---------------------------|---|--------|
| Isoalliin                                       | 6.86 | 178 | 88, 91, 116, 73, 132, 160 | 2 | FO; BO |
| Methionine sulfoxide                            | 4.70 | 166 | 121, 149, 131             | 2 | FO; BO |
| <i>S</i> -propyl-L-cysteine sulfoxide (Propiin) | 8.68 | 180 | 162, 144, 134             |   | BO     |

***S*-Alk(en)yl-L-Cysteine Derivatives**

|                               |      |     |                       |   |        |
|-------------------------------|------|-----|-----------------------|---|--------|
| <i>S</i> -Allylcysteine (SAC) | 4.50 | 162 | 145, 115, 134, 76, 99 | 1 | FO; BO |
|-------------------------------|------|-----|-----------------------|---|--------|

|                                                     |      |     |                                              |   |        |
|-----------------------------------------------------|------|-----|----------------------------------------------|---|--------|
| <i>S</i> -Allylmercapto- <i>L</i> -cysteine (SAMC)  | 3.92 | 194 | <b>171</b> , 154, 130, 136, 118              | 2 | FO     |
| <i>S</i> -Propyl- <i>L</i> -cysteine (Deoxypropiin) | 9.38 | 164 | <b>103</b> , 122, 132, 146                   | 2 | FO     |
| <i>S</i> -Propylmercapto- <i>L</i> -cysteine (SPMC) | 3.78 | 196 | <b>104</b> , 171, 145, 110, 130, 184         | 2 | FO; BO |
| <i>S</i> -(2-carboxypropyl) cysteine-glycine        | 6.95 | 265 | <b>120</b> , 161, 230, 171, 244, 258         | 2 | FO     |
| <i>S</i> -(2-Carboxypropyl) cysteine                | 5.96 | 208 | <b>105</b> , 171, 182, 132, 118, 146,<br>159 | 2 | BO     |
| <i>S</i> -Allylglutathione (SAG)                    | 4.69 | 348 | <b>229</b> , 203, 244, 105, 118, 270         | 2 | BO     |

\*Metabolite standards initiative (MSI) metabolite identification (MI) levels<sup>31</sup>. Reference compounds were available for all compounds identified at MSI MI level 1. RT: Retention time; m/z = mass to charge ratio; quantifier ions are reported in bold; FO: Fresh Onion; BO; Black Onion. Compounds for which there was a reference compound were quantified with them, while for the rest, the most structurally similar reference compound was used. Isorhamnetin was quantified with quercetin.  $\gamma$ -Glutamyl-*S*-Alk(en)yl-*L*-Cysteine Sulfoxides and  $\gamma$ -Glutamyl-*S*-Alk(en)yl-*L*-Cysteine were quantified with GSAC; Isoalliin was quantified with Alliin and Propiin with Methiin. *S*-Alk(en)yl-*L*-Cysteine were quantified with SAC.
